# Supplementary material for: Molecular detection and genotyping of intestinal protozoa from different biogeographical regions of Colombia
Source: PeerJ. 2020 Mar 9;8:e8554. doi: 10.7717/peerj.8554 (PMC7067185; doi:10.7717/peerj.8554)
Supplement: Supplemental Information 1 — Metadata of the samples collected and analyzed in this study [file peerj-08-8554-s001.xlsx]

## Sheet: Diagnóstico
																			Giardia
							Microscopy					Detection by PCR							Assemblage		Blastocystis		Cryptosporidium
Number	Code	Region	Department	City/municipality	Cycle	Age in years	Giardia	Blastocystis	Entamoeba	Cryptosporidium	Others	IAC	Giardia	Blasto	Crypto	E. dispar	E. moshkovski	E. histolytica	gdh	tpi	Subtype	Allele	Species
1	1	Pacífico	Cauca	Popayán	urbano	1	0	0	0	NA	0	NA	0	0	0	0	0	0	0	NA	0	0	0
2	2	Pacífico	Cauca	Popayán	urbano	1	0	0	0	NA	0	NA	0	1	1	0	0	0	0	NA	0	0	0
3	3	Pacífico	Cauca	Popayán	urbano	1	0	0	0	NA	0	NA	0	1	0	0	0	0	0	NA	0	0	0
4	4	Pacífico	Cauca	Popayán	urbano	3	0	0	0	NA	0	NA	0	1	0	0	0	0	0	NA	3	34	0
5	5	Pacífico	Cauca	Popayán	urbano	4	1	0	0	NA	0	NA	0	1	1	0	0	0	0	NA	0	0	C.hominis IbA9G3R2
6	6	Pacífico	Cauca	Popayán	urbano	2	0	1	0	NA	0	NA	0	1	0	0	0	0	0	NA	0	0	0
7	7	Pacífico	Cauca	Popayán	rural	2	0	0	0	NA	0	NA	0	0	0	0	0	0	0	NA	0	0	0
8	8	Pacífico	Cauca	Popayán	urbano	1	0	0	0	NA	0	NA	0	0	0	0	0	0	0	NA	0	0	0
9	9	Pacífico	Cauca	Popayán	urbano	2	0	0	0	NA	0	NA	0	0	0	0	0	0	0	NA	0	0	0
10	10	Pacífico	Cauca	Popayán	urbano	3	0	0	0	NA	0	NA	0	1	0	0	0	0	0	NA	1	4	0
11	11	Pacífico	Cauca	Popayán	urbano	4	0	0	0	NA	0	NA	0	0	0	0	0	0	0	NA	0	0	0
12	12	Pacífico	Cauca	Popayán	urbano	4	1	0	0	NA	0	NA	0	0	0	0	0	0	0	NA	0	0	0
13	13	Pacífico	Cauca	Popayán	urbano	3	0	1	0	NA	0	NA	0	0	0	0	0	0	0	NA	0	0	0
14	14	Pacífico	Cauca	Popayán	urbano	4	0	1	0	NA	1	NA	1	1	0	0	0	0	BIII	NA	3	57	0
15	15	Pacífico	Cauca	Popayán	urbano	3	1	0	0	NA	0	NA	1	1	0	0	0	0	0	NA	0	0	0
16	16	Pacífico	Cauca	Popayán	rural	3	0	0	0	NA	0	NA	0	0	0	0	0	0	0	NA	0	0	0
17	17	Pacífico	Cauca	Popayán	urbano	3	0	1	0	NA	0	NA	0	1	0	0	0	0	0	NA	3	34	0
18	18	Pacífico	Cauca	Popayán	urbano	2	0	0	0	NA	0	NA	0	1	1	0	0	0	0	NA	3	34	C. Parvum IIa
19	19	Pacífico	Cauca	Popayán	urbano	2	0	1	0	NA	0	NA	0	0	0	0	0	0	0	NA	0	0	0
20	20	Pacífico	Cauca	Popayán	urbano	3	0	0	0	NA	0	NA	0	0	1	0	0	0	0	NA	0	0	0
21	21	Pacífico	Cauca	Popayán	rural	2	0	1	0	NA	0	NA	0	1	0	0	0	0	0	NA	3	34	0
22	22	Pacífico	Cauca	Popayán	urbano	3	0	0	0	NA	0	NA	0	0	0	0	0	0	0	NA	0	0	0
23	23	Pacífico	Cauca	Popayán	urbano	3	0	0	0	NA	1	NA	0	0	0	0	0	0	0	NA	0	0	0
24	24	Pacífico	Cauca	Popayán	urbano	3	0	0	0	NA	0	NA	0	0	0	0	0	0	0	NA	0	0	0
25	25	Pacífico	Cauca	Popayán	urbano	3	0	0	0	NA	0	NA	0	0	0	0	0	0	0	NA	0	0	0
26	26	Pacífico	Cauca	Popayán	urbano	3	0	0	0	NA	0	NA	0	0	0	0	0	0	0	NA	0	0	0
27	27	Pacífico	Cauca	Popayán	urbano	3	0	0	0	NA	0	NA	0	0	0	0	0	0	0	NA	0	0	0
28	28	Pacífico	Cauca	Popayán	urbano	3	0	0	0	NA	0	NA	0	0	0	0	0	0	0	NA	0	0	0
29	29	Pacífico	Cauca	Popayán	urbano	3	0	0	0	NA	1	NA	0	0	0	0	0	0	0	NA	0	0	0
30	30	Pacífico	Cauca	Popayán	rural	3	0	0	0	NA	0	NA	0	1	1	0	0	0	0	NA	1	4	C. Parvum IIa
31	31	Pacífico	Cauca	Popayán	urbano	3	0	1	0	NA	0	NA	0	0	1	0	0	0	0	NA	0	0	0
32	32	Pacífico	Cauca	Popayán	urbano	3	0	0	0	NA	0	NA	0	1	1	0	0	0	0	NA	0	0	0
33	33	Pacífico	Cauca	Popayán	urbano	3	0	0	0	NA	0	NA	0	0	1	0	0	0	0	NA	0	0	0
34	34	Pacífico	Cauca	Popayán	urbano	3	0	0	0	NA	0	NA	0	0	0	0	0	0	0	NA	0	0	0
35	35	Pacífico	Cauca	Popayán	urbano	3	0	0	0	NA	0	NA	0	0	0	0	0	0	0	NA	0	0	0
36	36	Pacífico	Cauca	Popayán	urbano	3	0	0	0	NA	0	NA	0	0	0	0	0	0	0	NA	0	0	0
37	37	Pacífico	Cauca	Popayán	urbano	3	0	1	0	NA	0	NA	1	1	0	0	0	0	0	NA	1	8	0
38	38	Pacífico	Cauca	Popayán	urbano	2	0	0	0	NA	0	NA	0	0	0	0	0	0	0	NA	0	0	0
39	39	Pacífico	Cauca	Popayán	urbano	3	0	1	0	NA	0	NA	0	1	0	0	0	0	0	NA	2	11	0
40	40	Pacífico	Cauca	Popayán	urbano	3	0	1	0	NA	0	NA	0	1	0	0	0	0	0	NA	0	0	0
41	41	Pacífico	Cauca	Popayán	urbano	3	0	0	0	NA	0	NA	0	0	0	0	0	0	0	NA	0	0	0
42	42	Pacífico	Cauca	Popayán	urbano	4	0	0	0	NA	0	NA	0	0	0	0	0	0	0	NA	0	0	0
43	43	Pacífico	Cauca	Popayán	urbano	3	0	0	0	NA	0	NA	0	0	0	0	0	0	0	NA	0	0	0
44	44	Pacífico	Cauca	Popayán	urbano	3	0	0	0	NA	0	NA	0	0	0	0	0	0	0	NA	0	0	0
45	45	Pacífico	Cauca	Popayán	urbano	3	0	1	0	NA	0	NA	0	1	0	0	0	0	0	NA	3	34	0
46	46	Pacífico	Cauca	Popayán	urbano	2	0	0	0	NA	0	NA	0	0	0	0	0	0	0	NA	0	0	0
47	47	Pacífico	Cauca	Popayán	urbano	4	0	1	0	NA	0	NA	0	1	0	0	0	0	0	NA	1	4	0
48	48	Pacífico	Cauca	Popayán	urbano	3	0	0	0	NA	0	NA	0	0	0	0	0	0	0	NA	0	0	0
49	49	Pacífico	Cauca	Popayán	urbano	3	0	0	0	NA	0	NA	0	0	0	0	0	0	0	NA	0	0	0
50	50	Pacífico	Cauca	Popayán	urbano	3	1	1	1	NA	1	NA	1	1	0	0	0	0	BIII	NA	1	4	0
51	51	Pacífico	Cauca	Popayán	urbano	4	0	0	0	NA	0	NA	0	0	0	0	0	0	0	NA	0	0	0
52	52	Pacífico	Cauca	Popayán	urbano	4	0	1	0	NA	1	NA	0	1	0	0	0	0	0	NA	1	4	0
53	54	Pacífico	Cauca	Popayán	urbano	3	0	0	0	NA	0	NA	0	0	0	0	0	0	0	NA	0	0	0
54	55	Pacífico	Cauca	Popayán	urbano	4	0	0	0	NA	0	NA	0	0	0	0	0	0	0	NA	0	0	0
55	56	Pacífico	Cauca	Popayán	urbano	3	0	1	0	NA	1	NA	0	1	0	0	0	0	0	NA	3	34	0
56	57	Pacífico	Cauca	Popayán	urbano	3	0	1	0	NA	0	NA	0	1	0	0	0	0	0	NA	0	0	0
57	58	Pacífico	Cauca	Popayán	urbano	3	0	0	0	NA	0	NA	0	0	0	0	0	0	0	NA	0	0	0
58	59	Pacífico	Cauca	Popayán	urbano	3	0	0	0	NA	1	NA	0	0	0	0	0	0	0	NA	0	0	0
59	60	Pacífico	Cauca	Popayán	rural	3	0	0	1	NA	1	NA	0	0	0	0	0	0	0	NA	0	0	0
60	61	Pacífico	Cauca	Popayán	urbano	3	0	0	0	NA	0	NA	0	0	0	0	0	0	0	NA	0	0	0
61	62	Pacífico	Cauca	Popayán	urbano	3	0	0	0	NA	1	NA	0	0	0	0	0	0	0	NA	0	0	0
62	63	Pacífico	Cauca	Popayán	urbano	3	0	0	0	NA	0	NA	0	0	0	0	0	0	0	NA	0	0	0
63	64	Pacífico	Cauca	Popayán	urbano	3	1	1	0	NA	1	NA	1	1	0	0	0	0	0	NA	0	0	0
64	65	Pacífico	Cauca	Popayán	urbano	4	0	0	0	NA	0	NA	0	0	0	0	0	0	0	NA	0	0	0
65	66	Pacífico	Cauca	Popayán	urbano	3	0	1	0	NA	0	NA	0	1	0	0	0	0	0	NA	1	4	0
66	68	Pacífico	Cauca	Popayán	urbano	4	0	0	0	NA	0	NA	0	0	0	0	0	0	0	NA	0	0	0
67	69	Pacífico	Cauca	Popayán	urbano	3	0	0	0	NA	0	NA	0	0	0	0	0	0	0	NA	0	0	0
68	71	Pacífico	Cauca	Popayán	urbano	4	1	0	0	NA	0	NA	1	0	0	0	0	0	0	NA	0	0	0
69	72	Pacífico	Cauca	Popayán	urbano	3	0	0	0	NA	0	NA	0	0	0	0	0	0	0	NA	0	0	0
70	73	Pacífico	Cauca	Popayán	urbano	2	0	0	0	NA	0	NA	0	0	1	0	0	0	0	NA	0	0	0
71	74	Pacífico	Cauca	Popayán	urbano	3	0	0	0	NA	0	NA	0	0	1	0	0	0	0	NA	0	0	C. Parvum
72	75	Pacífico	Cauca	Popayán	urbano	2	0	0	0	NA	0	NA	0	0	0	0	0	0	0	NA	0	0	0
73	76	Pacífico	Cauca	Popayán	urbano	3	0	0	0	NA	1	NA	0	0	0	0	0	0	0	NA	0	0	0
74	77	Pacífico	Cauca	Popayán	urbano	3	1	1	0	NA	1	NA	1	1	0	0	0	0	0	NA	0	0	0
75	78	Pacífico	Cauca	Popayán	urbano	2	0	0	0	NA	0	NA	0	0	0	0	0	0	0	NA	0	0	0
76	79	Pacífico	Cauca	Popayán	urbano	4	1	1	0	NA	1	NA	0	1	0	0	0	0	BIV	NA	3	57	0
77	80	Pacífico	Cauca	Popayán	urbano	3	0	0	0	NA	0	NA	0	0	0	0	0	0	0	NA	0	0	0
78	90	Pacífico	Cauca	Popayán	urbano	3	0	0	0	NA	0	NA	NA	NA	NA	NA	NA	NA	NA	NA	NA	NA	NA
79	91	Pacífico	Cauca	Popayán	urbano	3	0	0	0	NA	0	NA	0	0	0	0	0	0	0	NA	0	0	0
80	92	Pacífico	Cauca	Popayán	urbano	4	0	0	0	NA	0	NA	0	0	0	0	0	0	0	NA	0	0	0
81	93	Pacífico	Cauca	Popayán	urbano	4	0	0	0	NA	0	NA	0	0	0	0	0	0	0	NA	0	0	0
82	94	Pacífico	Cauca	Popayán	urbano	4	0	0	0	NA	0	NA	0	0	0	0	0	0	0	NA	0	0	0
83	95	Pacífico	Cauca	Popayán	urbano	4	0	0	0	NA	0	NA	1	1	0	0	0	0	BIII	NA	2	12	0
84	96	Pacífico	Cauca	Popayán	urbano	4	1	1	0	NA	1	NA	0	1	0	0	0	0	0	NA	4	91	0
85	97	Pacífico	Cauca	Popayán	urbano	4	0	0	0	NA	0	NA	0	1	0	0	0	0	0	NA	3	34	0
86	98	Pacífico	Cauca	Popayán	urbano	4	0	0	0	NA	0	NA	0	0	0	0	0	0	0	NA	0	0	0
87	99	Pacífico	Cauca	Popayán	urbano	2	0	1	0	NA	1	NA	0	1	0	0	0	0	0	NA	2	11	0
88	100	Pacífico	Cauca	Popayán	urbano	3	0	0	0	NA	0	NA	0	0	1	0	0	0	0	NA	0	0	0
89	101	Pacífico	Cauca	Popayán	urbano	2	1	0	0	NA	0	NA	0	1	0	0	0	0	0	NA	1	4	0
90	102	Pacífico	Cauca	Popayán	urbano	3	0	0	0	NA	0	NA	0	0	0	0	0	0	0	NA	0	0	0
91	103	Pacífico	Cauca	Popayán	urbano	3	0	0	0	NA	0	NA	0	1	0	0	0	0	0	NA	2	15	0
92	104	Pacífico	Cauca	Popayán	urbano	3	0	0	0	NA	0	NA	0	0	0	0	0	0	0	NA	0	0	0
93	105	Pacífico	Cauca	Popayán	urbano	4	0	0	0	NA	0	NA	0	1	0	0	0	0	0	NA	2	12	0
94	106	Pacífico	Cauca	Popayán	rural	4	0	0	0	NA	0	NA	0	0	0	0	0	0	0	NA	0	0	0
95	107	Pacífico	Cauca	Popayán	urbano	3	0	0	0	NA	0	NA	0	1	0	0	0	0	0	NA	3	34	0
96	108	Pacífico	Cauca	Popayán	urbano	4	0	0	0	NA	1	NA	0	0	1	0	0	0	0	NA	0	0	0
97	109	Pacífico	Cauca	Popayán	urbano	4	0	0	0	NA	0	NA	0	1	0	0	0	0	0	NA	1	4	0
98	110	Pacífico	Cauca	Popayán	urbano	4	0	0	0	NA	0	NA	0	1	0	0	0	0	0	NA	3	36	0
99	111	Pacífico	Cauca	Popayán	urbano	4	0	0	0	NA	0	NA	0	0	0	0	0	0	0	NA	0	0	0
100	112	Pacífico	Cauca	Popayán	urbano	4	0	0	0	NA	1	NA	0	1	0	0	0	0	0	NA	1	4	0
101	113	Pacífico	Cauca	Popayán	urbano	4	0	0	0	NA	0	NA	0	0	0	0	0	0	0	NA	0	0	0
102	114	Pacífico	Cauca	Popayán	urbano	4	0	0	0	NA	0	NA	0	0	1	0	0	0	0	NA	0	0	C. Parvum IIa
103	115	Pacífico	Cauca	Popayán	urbano	4	0	0	0	NA	0	NA	0	0	1	0	0	0	0	NA	0	0	0
104	116	Pacífico	Cauca	Popayán	urbano	4	0	0	0	NA	1	NA	0	0	0	0	0	0	0	NA	0	0	0
105	117	Pacífico	Cauca	Popayán	urbano	4	0	0	0	NA	1	NA	0	0	0	0	0	0	0	NA	0	0	0
106	118	Pacífico	Cauca	Popayán	urbano	3	0	0	0	NA	0	NA	0	0	0	0	0	0	0	NA	0	0	0
107	119	Pacífico	Cauca	Popayán	urbano	3	0	0	0	NA	0	NA	0	0	0	0	0	0	0	NA	0	0	0
108	120	Pacífico	Cauca	Popayán	urbano	4	0	1	0	NA	0	NA	0	0	0	0	0	0	0	NA	0	0	0
109	121	Pacífico	Cauca	Popayán	urbano	4	0	0	0	NA	1	NA	0	1	0	0	0	0	0	NA	1	4	0
110	122	Pacífico	Cauca	Popayán	urbano	3	0	0	0	NA	0	NA	0	0	0	0	0	0	0	NA	0	0	0
111	123	Pacífico	Cauca	Popayán	urbano	4	0	0	0	NA	0	NA	0	1	0	0	1	0	0	NA	3	34	0
112	124	Pacífico	Cauca	Popayán	urbano	3	0	0	0	NA	0	NA	1	0	0	0	0	0	BIII	NA	0	0	0
113	125	Pacífico	Cauca	Popayán	urbano	2	0	0	0	NA	0	NA	0	1	0	0	0	0	0	NA	3	57	0
114	126	Pacífico	Cauca	Popayán	urbano	3	0	0	0	NA	0	NA	1	0	0	0	0	0	BIII	NA	0	0	0
115	127	Pacífico	Cauca	Popayán	urbano	3	0	0	0	NA	0	NA	0	1	1	0	0	0	0	NA	4	42	0
116	128	Pacífico	Cauca	Popayán	urbano	3	0	0	0	NA	0	NA	0	0	0	0	0	0	0	NA	0	0	0
117	129	Pacífico	Cauca	Popayán	urbano	4	0	0	0	NA	0	NA	0	0	0	0	0	0	0	NA	1	4	0
118	130	Pacífico	Cauca	Popayán	urbano	4	0	0	0	NA	0	NA	0	0	0	0	0	0	0	NA	0	0	0
119	131	Pacífico	Cauca	Popayán	urbano	3	0	0	0	NA	0	NA	0	0	0	0	0	0	0	NA	0	0	0
120	132	Pacífico	Cauca	Popayán	urbano	4	0	0	0	NA	0	NA	0	1	0	0	0	0	0	NA	1	4	0
121	133	Pacífico	Cauca	Popayán	urbano	4	0	0	0	NA	1	NA	0	1	0	0	0	0	BIV	NA	2	12	0
122	134	Pacífico	Cauca	Popayán	urbano	4	0	1	0	NA	0	NA	0	0	0	0	0	0	0	NA	0	0	0
123	135	Pacífico	Cauca	Popayán	urbano	4	1	0	0	NA	0	NA	1	0	0	0	0	0	0	NA	0	0	0
124	136	Pacífico	Cauca	Popayán	urbano	4	0	0	0	NA	0	NA	0	0	0	0	0	0	0	NA	0	0	0
125	137	Pacífico	Cauca	Popayán	urbano	4	0	0	0	NA	0	NA	0	0	0	0	0	0	0	NA	0	0	0
126	138	Pacífico	Cauca	Popayán	urbano	4	0	0	0	NA	0	NA	0	0	0	0	0	0	0	NA	0	0	0
127	139	Pacífico	Cauca	Popayán	urbano	4	0	0	0	NA	0	NA	NA	NA	NA	NA	NA	NA	NA	NA	NA	NA	NA
128	140	Pacífico	Cauca	Popayán	urbano	4	0	0	0	NA	0	NA	0	0	0	0	0	0	0	NA	0	0	0
129	141	Pacífico	Cauca	Popayán	urbano	4	0	0	0	NA	0	NA	0	0	0	0	0	0	0	NA	0	0	0
130	142	Pacífico	Cauca	Popayán	urbano	3	0	0	0	NA	0	NA	0	0	0	0	0	0	0	NA	0	0	0
131	143	Pacífico	Cauca	Popayán	urbano	2	0	0	0	NA	0	NA	0	0	0	0	0	0	0	NA	0	0	0
132	144	Pacífico	Cauca	Popayán	urbano	3	0	0	0	NA	0	NA	0	0	0	0	0	0	0	NA	0	0	0
133	145	Pacífico	Cauca	Popayán	urbano	3	0	0	0	NA	0	NA	0	0	0	0	0	0	0	NA	0	0	0
134	146	Pacífico	Cauca	Popayán	urbano	4	0	0	0	NA	0	NA	0	0	0	0	0	0	0	NA	0	0	0
135	147	Pacífico	Cauca	Popayán	urbano	3	0	0	0	NA	0	NA	0	0	0	0	0	0	0	NA	0	0	0
136	148	Pacífico	Cauca	Popayán	urbano	4	0	0	0	NA	0	NA	0	1	0	0	0	0	0	NA	1	4	0
137	149	Pacífico	Cauca	Popayán	urbano	3	0	0	0	NA	0	NA	0	0	0	0	0	0	0	NA	0	0	0
138	150	Pacífico	Cauca	Popayán	urbano	3	0	0	0	NA	0	NA	0	0	0	0	0	0	0	NA	0	0	0
139	151	Pacífico	Cauca	Popayán	urbano	3	0	1	0	NA	0	NA	0	1	0	0	0	0	0	NA	0	0	0
140	152	Pacífico	Cauca	Popayán	urbano	3	0	1	0	NA	0	NA	0	1	0	0	0	0	0	NA	1	4	0
141	153	Pacífico	Cauca	Popayán	urbano	4	0	0	0	NA	1	NA	1	0	0	0	0	0	0	NA	0	0	0
142	154	Pacífico	Cauca	Popayán	urbano	3	1	0	0	NA	0	NA	1	0	0	0	0	0	0	NA	0	0	0
143	155	Pacífico	Cauca	Popayán	urbano	3	0	0	0	NA	0	NA	0	1	0	0	0	0	0	NA	3	34	0
144	156	Pacífico	Cauca	Popayán	urbano	3	0	1	0	NA	0	NA	0	1	0	0	0	0	0	NA	1	4	0
145	157	Pacífico	Cauca	Popayán	urbano	4	0	0	0	NA	0	NA	0	1	0	0	0	0	0	NA	2	12	0
146	158	Pacífico	Cauca	Popayán	urbano	2	0	0	0	NA	0	NA	0	0	0	0	0	0	0	NA	0	0	0
147	159	Pacífico	Cauca	Popayán	urbano	4	0	0	0	NA	0	NA	0	1	0	0	0	0	0	NA	3	34	0
148	160	Pacífico	Cauca	Popayán	urbano	3	0	1	0	NA	0	NA	0	1	0	0	0	0	0	NA	0	0	0
149	161	Pacífico	Cauca	Popayán	urbano	3	0	0	0	NA	0	NA	0	0	0	0	0	0	0	NA	0	0	0
150	162	Pacífico	Cauca	Popayán	urbano	3	1	0	0	NA	0	NA	1	0	0	0	0	0	0	NA	0	0	0
151	163	Pacífico	Cauca	Popayán	urbano	2	0	0	0	NA	1	NA	0	0	0	0	0	0	0	NA	0	0	0
152	164	Pacífico	Cauca	Popayán	urbano	3	0	0	0	NA	0	NA	0	0	0	0	0	0	0	NA	0	0	0
153	165	Pacífico	Cauca	Popayán	urbano	2	0	1	0	NA	0	NA	0	1	0	0	0	0	0	NA	0	0	0
154	166	Pacífico	Cauca	Popayán	urbano	2	0	1	0	NA	0	NA	0	0	0	0	0	0	0	NA	0	0	0
155	167	Pacífico	Cauca	Popayán	urbano	4	0	0	0	NA	0	NA	0	1	0	0	0	0	0	NA	1	4	0
156	168	Pacífico	Cauca	Popayán	urbano	2	0	0	0	NA	0	NA	0	0	0	0	0	0	0	NA	0	0	0
157	169	Pacífico	Cauca	Popayán	urbano	3	0	0	0	NA	0	NA	0	0	0	0	0	0	0	NA	0	0	0
158	170	Pacífico	Cauca	Popayán	urbano	2	0	0	0	NA	0	NA	1	0	0	0	0	0	0	NA	0	0	0
159	171	Pacífico	Cauca	Popayán	urbano	2	0	0	0	NA	0	NA	0	0	0	0	0	0	0	NA	0	0	0
160	172	Pacífico	Cauca	Popayán	urbano	3	1	0	0	NA	0	NA	0	0	1	0	0	0	0	NA	0	0	0
161	173	Pacífico	Cauca	Popayán	urbano	3	0	0	0	NA	0	NA	1	1	0	0	0	0	0	NA	0	0	0
162	174	Pacífico	Cauca	Popayán	urbano	2	0	0	0	NA	0	NA	0	0	0	0	0	0	0	NA	0	0	0
163	175	Pacífico	Cauca	Popayán	urbano	2	1	0	0	NA	0	NA	1	0	0	0	0	0	BIV	NA	0	0	0
164	176	Pacífico	Cauca	Popayán	urbano	4	0	1	0	NA	0	NA	0	1	0	0	0	0	0	NA	0	0	0
165	177	Pacífico	Cauca	Popayán	urbano	2	0	1	0	NA	1	NA	0	1	0	0	0	0	0	NA	1	4	0
166	178	Pacífico	Cauca	Popayán	urbano	2	1	1	0	NA	0	NA	NA	NA	NA	NA	NA	NA	NA	NA	NA	NA	NA
167	179	Pacífico	Cauca	Popayán	urbano	3	0	0	0	NA	0	NA	1	0	0	0	0	0	0	NA	0	0	0
168	180	Pacífico	Cauca	Popayán	urbano	3	0	1	0	NA	0	NA	0	0	0	0	0	0	0	NA	0	0	0
169	181	Pacífico	Cauca	Popayán	urbano	4	0	0	0	NA	0	NA	0	0	0	0	0	0	0	NA	0	0	0
170	182	Pacífico	Cauca	Popayán	urbano	4	0	0	0	NA	0	NA	0	1	0	0	0	0	0	NA	0	0	0
171	183	Pacífico	Cauca	Popayán	urbano	4	0	0	0	NA	0	NA	0	1	0	0	0	0	0	NA	3	34	0
172	184	Pacífico	Cauca	Popayán	urbano	3	0	1	0	NA	0	NA	0	0	0	0	0	0	0	NA	0	0	0
173	185	Pacífico	Cauca	Popayán	urbano	4	0	0	0	NA	0	NA	0	0	0	0	0	0	0	NA	0	0	0
174	186	Pacífico	Cauca	Popayán	urbano	4	0	0	0	NA	0	NA	0	0	0	0	0	0	0	NA	0	0	0
175	187	Pacífico	Cauca	Popayán	urbano	4	0	1	0	NA	1	NA	0	0	0	0	0	0	0	NA	0	0	0
176	188	Pacífico	Cauca	Popayán	urbano	2	0	0	0	NA	0	NA	0	1	0	0	0	0	0	NA	1	4	0
177	189	Pacífico	Cauca	Popayán	urbano	3	0	0	0	NA	0	NA	0	0	0	0	0	0	0	NA	0	0	0
178	190	Pacífico	Cauca	Popayán	urbano	4	1	1	0	NA	0	NA	0	1	0	0	0	0	0	NA	0	0	0
179	191	Pacífico	Cauca	Popayán	urbano	2	0	0	0	NA	1	NA	1	1	0	0	0	0	0	NA	3	151	0
180	192	Pacífico	Cauca	Popayán	urbano	3	0	1	0	NA	0	NA	0	1	0	0	0	0	0	NA	0	0	0
181	193	Pacífico	Cauca	Popayán	urbano	3	0	1	0	NA	0	NA	1	1	0	0	0	0	AII	NA	0	0	0
182	194	Pacífico	Cauca	Popayán	urbano	3	0	1	0	NA	0	NA	0	0	0	0	0	0	0	NA	0	0	0
183	195	Pacífico	Cauca	Popayán	urbano	2	0	0	0	NA	0	NA	0	1	0	0	0	0	0	NA	3	34	0
184	196	Pacífico	Cauca	Popayán	urbano	4	0	1	0	NA	0	NA	1	0	0	0	0	0	0	NA	0	0	0
185	197	Pacífico	Cauca	Popayán	urbano	4	0	1	0	NA	0	NA	0	1	0	0	0	0	0	NA	3	31	0
186	198	Pacífico	Cauca	Popayán	urbano	4	0	1	0	NA	0	NA	0	1	0	0	0	0	0	NA	2	12	0
187	199	Pacífico	Cauca	Popayán	urbano	4	0	0	0	NA	1	NA	0	0	0	0	0	0	0	NA	0	0	0
188	200	Pacífico	Cauca	Popayán	urbano	4	0	0	0	NA	0	NA	0	1	0	0	0	0	0	NA	3	38	0
189	201	Pacífico	Cauca	Popayán	urbano	2	0	1	0	NA	0	NA	0	1	0	0	0	0	0	NA	0	0	0
190	202	Pacífico	Cauca	Popayán	urbano	2	0	0	0	NA	0	NA	1	1	1	0	0	0	D	NA	1	4	0
191	203	Pacífico	Cauca	Popayán	urbano	2	0	1	0	NA	0	NA	0	0	0	0	0	0	0	NA	0	0	0
192	204	Pacífico	Cauca	Popayán	urbano	4	1	1	0	NA	0	NA	1	0	0	0	0	0	BIII	NA	0	0	0
193	205	Pacífico	Cauca	Popayán	urbano	2	0	0	0	NA	0	NA	1	0	0	0	0	0	0	NA	0	0	0
194	206	Pacífico	Cauca	Popayán	urbano	4	0	0	0	NA	1	NA	0	0	0	0	0	0	0	NA	0	0	0
195	207	Pacífico	Cauca	Popayán	urbano	4	0	0	0	NA	0	NA	0	0	0	0	0	0	0	NA	0	0	0
196	208	Pacífico	Cauca	Popayán	urbano	4	1	0	0	NA	1	NA	0	0	0	0	0	0	0	NA	0	0	0
197	209	Pacífico	Cauca	Popayán	urbano	3	0	0	0	NA	0	NA	0	1	0	0	0	0	0	NA	0	0	0
198	210	Pacífico	Cauca	Popayán	urbano	3	0	1	0	NA	1	NA	0	1	0	0	0	0	0	NA	0	0	0
199	211	Pacífico	Cauca	Popayán	urbano	4	0	1	0	NA	1	NA	0	1	1	0	0	0	0	NA	1	4	0
200	212	Pacífico	Cauca	Popayán	urbano	4	0	0	0	NA	1	NA	0	0	0	0	0	0	0	NA	0	0	0
201	213	Pacífico	Cauca	Popayán	urbano	4	0	1	0	NA	0	NA	0	0	0	0	0	0	0	NA	0	0	0
202	214	Pacífico	Cauca	Popayán	urbano	4	0	1	0	NA	0	NA	0	1	0	0	0	0	0	NA	1	4	0
203	215	Pacífico	Cauca	Popayán	urbano	3	0	0	0	NA	0	NA	0	1	0	0	0	0	0	NA	3	34	0
204	216	Pacífico	Cauca	Popayán	urbano	3	0	0	0	NA	0	NA	0	0	0	0	0	0	0	NA	0	0	0
205	217	Pacífico	Cauca	Popayán	urbano	3	0	0	0	NA	0	NA	0	0	0	0	0	0	0	NA	0	0	0
206	218	Pacífico	Cauca	Popayán	urbano	2	0	0	0	NA	0	NA	0	0	0	0	0	0	0	NA	0	0	0
207	219	Pacífico	Cauca	Popayán	urbano	2	0	1	0	NA	0	NA	0	0	0	0	0	0	0	NA	0	0	0
208	220	Pacífico	Cauca	Popayán	urbano	4	0	1	0	NA	0	NA	0	1	0	0	0	0	0	NA	0	0	0
209	221	Pacífico	Cauca	Popayán	urbano	4	0	0	0	NA	0	NA	0	1	0	0	0	0	0	NA	2	12	0
210	222	Pacífico	Cauca	Popayán	urbano	4	0	0	0	NA	1	NA	0	0	0	0	0	0	0	NA	0	0	0
211	223	Pacífico	Cauca	Popayán	urbano	3	0	1	0	NA	1	NA	0	1	0	0	0	0	0	NA	3	34	0
212	224	Pacífico	Cauca	Popayán	urbano	4	0	0	0	NA	0	NA	0	1	0	0	0	0	0	NA	0	0	0
213	225	Pacífico	Cauca	Popayán	urbano	3	0	0	0	NA	0	NA	0	0	0	0	0	0	0	NA	0	0	0
214	226	Pacífico	Cauca	Popayán	urbano	3	0	0	0	NA	1	NA	0	0	0	0	0	0	0	NA	0	0	0
215	227	Pacífico	Cauca	Popayán	urbano	3	0	0	0	NA	0	NA	0	0	0	0	0	0	0	NA	0	0	0
216	228	Pacífico	Cauca	Popayán	urbano	4	0	0	0	NA	0	NA	0	0	0	0	0	0	0	NA	0	0	0
217	229	Pacífico	Cauca	Popayán	urbano	3	1	1	0	NA	0	NA	0	1	0	0	0	0	0	NA	0	0	0
218	230	Pacífico	Cauca	Popayán	urbano	3	0	0	0	NA	0	NA	0	0	0	0	0	0	0	NA	0	0	0
219	231	Pacífico	Cauca	Popayán	urbano	2	0	0	0	NA	0	NA	0	0	0	0	0	0	0	NA	0	0	0
220	232	Pacífico	Cauca	Popayán	urbano	3	0	0	0	NA	0	NA	0	0	0	0	0	0	0	NA	0	0	0
221	233	Pacífico	Cauca	Popayán	urbano	4	0	1	0	NA	1	NA	0	0	0	0	0	0	0	NA	0	0	0
222	234	Pacífico	Cauca	Popayán	urbano	4	0	1	0	NA	0	NA	0	1	0	0	0	0	0	NA	0	0	0
223	235	Pacífico	Cauca	Popayán	urbano	4	0	0	0	NA	0	NA	0	0	0	0	0	0	0	NA	0	0	0
224	236	Pacífico	Cauca	Popayán	urbano	4	0	1	0	NA	0	NA	0	0	0	0	0	0	0	NA	0	0	0
225	237	Pacífico	Cauca	Popayán	urbano	4	0	1	0	NA	1	NA	0	1	0	0	0	0	0	NA	0	0	0
226	238	Pacífico	Cauca	Popayán	urbano	4	0	1	0	NA	0	NA	0	1	0	0	0	0	0	NA	0	0	0
227	240	Pacífico	Cauca	Popayán	urbano	4	0	0	0	NA	0	NA	0	0	1	0	0	0	0	NA	0	0	0
228	241	Pacífico	Cauca	Popayán	urbano	4	0	0	0	NA	0	NA	0	0	0	0	0	0	0	NA	0	0	0
229	242	Pacífico	Cauca	Popayán	urbano	4	0	0	0	NA	0	NA	0	0	0	0	0	0	0	NA	0	0	0
230	243	Pacífico	Cauca	Popayán	urbano	4	0	0	0	NA	0	NA	0	0	0	0	0	0	0	NA	0	0	0
231	244	Pacífico	Cauca	Popayán	urbano	4	0	0	0	NA	0	NA	0	1	1	0	0	0	0	NA	1	4	0
232	245	Pacífico	Cauca	Popayán	urbano	4	1	0	0	NA	0	NA	1	0	0	0	0	0	BIV	NA	0	0	0
233	246	Pacífico	Cauca	Popayán	urbano	4	0	0	0	NA	0	NA	0	0	0	0	0	0	0	NA	0	0	0
234	247	Pacífico	Cauca	Popayán	urbano	2	0	0	0	NA	0	NA	0	1	0	0	0	0	0	NA	0	0	0
235	248	Pacífico	Cauca	Popayán	urbano	4	0	0	0	NA	1	NA	1	1	1	0	0	0	0	NA	3	34	0
236	249	Pacífico	Cauca	Popayán	urbano	4	0	0	0	NA	0	NA	0	1	0	0	0	0	0	NA	0	0	0
237	250	Pacífico	Cauca	Popayán	urbano	2	0	0	0	NA	0	NA	0	0	0	0	0	0	0	NA	0	0	0
238	251	Pacífico	Cauca	Popayán	urbano	4	0	0	0	NA	0	NA	0	0	0	0	0	0	0	NA	0	0	0
239	252	Pacífico	Cauca	Popayán	urbano	4	0	0	0	NA	0	NA	0	1	0	0	0	0	0	NA	0	0	0
240	253	Pacífico	Cauca	Popayán	urbano	4	0	1	0	NA	0	NA	0	1	0	0	0	0	0	NA	0	0	0
241	254	Pacífico	Cauca	Popayán	urbano	4	0	0	0	NA	0	NA	0	1	0	0	0	0	0	NA	0	0	0
242	255	Pacífico	Cauca	Popayán	urbano	3	0	0	0	NA	0	NA	0	1	0	0	0	0	0	NA	0	0	0
243	256	Pacífico	Cauca	Popayán	urbano	4	0	0	0	NA	0	NA	0	1	0	0	0	0	0	NA	0	0	0
244	257	Pacífico	Cauca	Popayán	urbano	4	0	0	0	NA	0	NA	1	1	0	0	0	0	0	NA	1	80	0
245	258	Pacífico	Cauca	Popayán	urbano	3	0	0	0	NA	1	NA	0	0	0	0	0	0	0	NA	0	0	0
246	259	Pacífico	Cauca	Popayán	urbano	3	0	0	0	NA	0	NA	0	0	0	0	0	0	0	NA	0	0	0
247	260	Pacífico	Cauca	Popayán	urbano	4	0	0	0	NA	1	NA	0	1	0	0	0	0	0	NA	3	31	0
248	261	Pacífico	Cauca	Popayán	urbano	4	0	1	0	NA	0	NA	0	0	0	0	0	0	0	NA	0	0	0
249	262	Pacífico	Cauca	Popayán	urbano	4	0	0	0	NA	1	NA	0	1	1	0	0	0	0	NA	3	34	0
250	263	Pacífico	Cauca	Popayán	urbano	4	0	0	0	NA	1	NA	0	1	0	0	0	0	0	NA	0	0	0
251	264	Pacífico	Cauca	Popayán	urbano	4	0	0	0	NA	0	NA	0	1	1	0	0	0	0	NA	0	0	0
252	265	Pacífico	Cauca	Popayán	urbano	3	0	0	0	NA	1	NA	0	1	0	0	0	0	0	NA	3	34	0
253	266	Pacífico	Cauca	Popayán	urbano	4	0	1	0	NA	0	NA	0	0	1	0	0	0	0	NA	0	0	0
254	267	Pacífico	Cauca	Popayán	urbano	3	0	1	0	NA	0	NA	0	0	0	0	0	0	0	NA	0	0	0
255	268	Pacífico	Cauca	Popayán	urbano	3	0	1	0	NA	0	NA	0	1	0	0	0	0	0	NA	0	0	0
256	269	Pacífico	Cauca	Popayán	urbano	4	0	0	0	NA	0	NA	0	0	0	0	0	0	0	NA	0	0	0
257	270	Pacífico	Cauca	Popayán	urbano	2	0	0	0	NA	0	NA	0	1	1	0	0	0	0	NA	3	34	0
258	271	Pacífico	Cauca	Popayán	urbano	4	0	1	0	NA	1	NA	0	1	0	0	0	0	0	NA	0	0	0
259	AMZ-001	Amazonía	Amazonas	Leticia	urbano	4.7	1	0	0	1	1	0	0	NA	NA	NA	NA	NA	0	0	0	0	0
260	AMZ-002	Amazonía	Amazonas	Leticia	urbano	4.2	1	0	0	0	0	1	0	0	0	0	0	0	0	0	0	0	0
261	AMZ-003	Amazonía	Amazonas	Leticia	urbano	3.2	1	1	1	0	1	1	0	0	0	0	0	0	0	0	0	0	0
262	AMZ-004	Amazonía	Amazonas	Leticia	urbano	4.2	0	1	0	0	1	1	0	0	0	0	0	0	0	0	0	0	0
263	AMZ-005	Amazonía	Amazonas	Leticia	urbano	3.1	0	0	1	1	0	1	0	0	0	0	0	0	0	0	0	0	0
264	AMZ-006	Amazonía	Amazonas	Leticia	urbano	4	1	0	0	1	1	1	0	1	0	0	0	0	0	0	0	0	0
265	AMZ-007	Amazonía	Amazonas	Leticia	urbano	3.11	0	0	0	0	0	1	0	0	0	0	0	0	0	0	0	0	0
266	AMZ-008	Amazonía	Amazonas	Leticia	urbano	4.4	1	1	1	1	1	1	1	0	1	0	0	0	0	0	0	0	C. bovis
267	AMZ-009	Amazonía	Amazonas	Leticia	urbano	4.4	0	0	0	0	0	1	0	1	0	0	0	0	0	0	0	0	0
268	AMZ-010	Amazonía	Amazonas	Leticia	urbano	4.7	0	0	1	0	0	1	1	1	0	0	0	0	0	0	0	0	0
269	AMZ-011	Amazonía	Amazonas	Leticia	urbano	1.5	1	1	0	1	1	1	1	0	0	0	0	0	0	0	0	0	0
270	AMZ-012	Amazonía	Amazonas	Leticia	urbano	5	0	0	0	0	0	0	NA	NA	NA	NA	NA	NA	NA	NA	NA	NA	NA
271	AMZ-013	Amazonía	Amazonas	Leticia	urbano	4	0	0	1	0	1	0	NA	NA	NA	NA	NA	NA	NA	NA	NA	NA	NA
272	AMZ-014	Amazonía	Amazonas	Leticia	urbano	3	1	1	0	1	1	1	0	0	0	0	0	0	0	0	0	0	0
273	AMZ-015	Amazonía	Amazonas	Leticia	urbano	4	0	0	0	0	0	1	0	1	0	0	0	0	0	0	0	0	0
274	AMZ-016	Amazonía	Amazonas	Leticia	urbano	3	1	0	0	0	1	0	NA	NA	NA	NA	NA	NA	NA	NA	NA	NA	NA
275	AMZ-017	Amazonía	Amazonas	Leticia	urbano	4	1	1	0	1	1	1	0	0	0	0	0	0	0	0	0	0	0
276	AMZ-018	Amazonía	Amazonas	Leticia	urbano	3	0	0	1	0	1	1	0	1	0	0	0	0	0	0	0	0	0
277	AMZ-019	Amazonía	Amazonas	Leticia	urbano	4	1	0	1	0	0	1	0	0	0	0	0	0	0	0	0	0	0
278	AMZ-020	Amazonía	Amazonas	Leticia	urbano	3	0	0	0	0	0	1	1	0	0	0	0	0	0	0	0	0	0
279	AMZ-021	Amazonía	Amazonas	Leticia	urbano	3	1	1	0	1	1	0	NA	NA	NA	NA	NA	NA	NA	NA	NA	NA	NA
280	AMZ-022	Amazonía	Amazonas	Leticia	urbano	4	0	0	0	0	1	1	1	0	1	0	0	0	0	0	0	0	0
281	AMZ-023	Amazonía	Amazonas	Leticia	urbano	4	0	1	1	0	1	1	1	0	0	0	0	0	0	0	0	0	0
282	AMZ-024	Amazonía	Amazonas	Leticia	rural	3	1	1	0	1	1	1	1	1	0	0	0	0	0	0	0	0	0
283	AMZ-025	Amazonía	Amazonas	Leticia	rural	2.6	0	0	0	0	0	1	1	0	0	0	0	0	0	0	0	0	0
284	AMZ-026	Amazonía	Amazonas	Leticia	rural	1.4	1	1	0	1	1	1	1	0	0	0	0	0	0	0	0	0	0
285	AMZ-027	Amazonía	Amazonas	Leticia	rural	2	0	0	0	0	1	1	1	1	1	0	0	0	0	0	0	0	0
286	AMZ-028	Amazonía	Amazonas	Leticia	rural	8	1	1	1	1	1	1	1	0	0	0	0	0	0	0	0	0	0
287	AMZ-029	Amazonía	Amazonas	Leticia	rural	3	0	0	0	0	0	1	1	1	0	0	0	0	0	0	0	0	0
288	AMZ-030	Amazonía	Amazonas	Leticia	rural	2	0	0	1	0	1	1	1	1	0	0	0	0	0	0	0	0	0
289	AMZ-031	Amazonía	Amazonas	Leticia	rural	4	0	1	0	0	1	1	1	0	0	0	0	0	0	0	0	0	0
290	AMZ-032	Amazonía	Amazonas	Leticia	rural	7	0	0	0	0	1	1	1	0	0	0	0	0	0	0	0	0	0
291	AMZ-033	Amazonía	Amazonas	Leticia	rural	4	0	1	1	0	1	1	0	0	0	0	0	0	0	0	0	0	0
292	AMZ-034	Amazonía	Amazonas	Leticia	rural	2	0	0	0	0	1	1	0	0	0	0	0	0	0	0	0	0	0
293	AMZ-035	Amazonía	Amazonas	Leticia	rural	4	1	1	1	1	1	1	1	0	0	0	0	0	0	0	0	0	0
294	AMZ-036	Amazonía	Amazonas	Leticia	rural	4	1	0	0	1	1	1	1	0	1	0	0	0	0	0	0	0	C. andersoni
295	AMZ-037	Amazonía	Amazonas	Leticia	rural	2	1	1	0	0	1	1	0	1	0	0	0	0	0	0	0	0	0
296	AMZ-038	Amazonía	Amazonas	Leticia	rural	2	0	0	1	0	0	1	1	0	1	0	0	0	0	0	0	0	0
297	AMZ-039	Amazonía	Amazonas	Leticia	rural	2	1	1	0	1	1	1	1	0	0	0	0	0	0	0	0	0	0
298	AMZ-040	Amazonía	Amazonas	Puerto Nariño	rural	3	0	0	0	0	0	1	1	0	0	0	0	0	0	0	0	0	0
299	AMZ-041	Amazonía	Amazonas	Puerto Nariño	rural	5	1	1	0	1	1	1	0	0	0	0	0	0	0	0	0	0	0
300	AMZ-042	Amazonía	Amazonas	Puerto Nariño	rural	4	0	0	0	0	1	1	1	1	0	0	0	0	0	0	0	0	0
301	AMZ-043	Amazonía	Amazonas	Puerto Nariño	rural	4	1	1	1	1	1	1	0	1	0	0	0	0	0	0	0	0	0
302	AMZ-044	Amazonía	Amazonas	Puerto Nariño	rural	4	0	0	0	0	0	1	1	0	0	0	0	0	0	0	0	0	0
303	AMZ-045	Amazonía	Amazonas	Puerto Nariño	rural	4	0	0	1	0	1	1	1	1	0	0	0	0	0	0	0	0	0
304	AMZ-046	Amazonía	Amazonas	Puerto Nariño	rural	3	1	0	0	0	1	1	1	0	0	0	0	0	0	0	0	0	0
305	AMZ-047	Amazonía	Amazonas	Puerto Nariño	rural	10	0	1	0	0	1	1	1	0	0	0	0	0	0	0	0	0	0
306	AMZ-048	Amazonía	Amazonas	Puerto Nariño	rural	5	0	0	1	0	0	1	0	0	0	0	0	0	0	0	0	0	0
307	AMZ-049	Amazonía	Amazonas	Puerto Nariño	rural	3	1	1	0	1	1	1	1	0	0	0	0	0	0	0	0	0	0
308	AMZ-050	Amazonía	Amazonas	Puerto Nariño	rural	11	0	0	0	0	1	1	1	0	0	0	0	0	0	0	0	0	0
309	ANT-001	Andina	Antioquia	Medellin	urbano	8	1	0	1	0	1	1	1	1	1	0	0	0	0	0	0	0	C. muris
310	ANT-002	Andina	Antioquia	Medellin	urbano	3	0	0	1	0	1	1	1	1	0	0	0	0	0	0	0	0	0
311	ANT-003	Andina	Antioquia	Medellin	urbano	2	1	1	1	1	1	1	0	1	0	0	0	0	0	0	0	0	0
312	ANT-004	Andina	Antioquia	Medellin	urbano	4	0	0	0	0	1	0	NA	NA	NA	NA	NA	NA	NA	NA	NA	NA	NA
313	ANT-005	Andina	Antioquia	Medellin	urbano	7	0	0	0	1	0	1	1	1	0	0	0	0	0	0	0	0	0
314	ANT-006	Andina	Antioquia	Medellin	urbano	4	1	1	1	0	1	0	NA	NA	NA	NA	NA	NA	NA	NA	NA	NA	NA
315	ANT-007	Andina	Antioquia	Medellin	urbano	2	0	0	0	0	0	1	0	1	0	0	0	0	0	0	0	0	0
316	ANT-008	Andina	Antioquia	Medellin	urbano	4	1	1	1	1	1	1	1	0	0	0	0	0	0	0	0	0	0
317	ANT-009	Andina	Antioquia	Medellin	urbano	4	0	0	0	0	1	1	1	1	1	0	0	0	0	0	0	0	0
318	ANT-010	Andina	Antioquia	Medellin	urbano	2	0	0	0	1	0	1	0	0	0	0	0	0	0	0	0	0	0
319	ANT-011	Andina	Antioquia	Rio Negro	urbano	2	1	1	1	0	1	1	0	0	0	0	0	0	0	0	0	0	0
320	ANT-012	Andina	Antioquia	Rio Negro	urbano	2	0	0	0	0	0	1	1	1	0	0	0	0	0	0	0	0	0
321	ANT-013	Andina	Antioquia	Rio Negro	urbano	3	0	0	0	1	0	1	1	1	0	0	0	0	0	0	0	0	0
322	ANT-014	Andina	Antioquia	Rio Negro	urbano	5	1	1	1	0	1	1	0	0	0	0	0	0	0	0	0	0	0
323	ANT-015	Andina	Antioquia	Rio Negro	urbano	4	0	0	0	0	0	1	1	0	1	0	0	0	0	0	0	0	0
324	ANT-016	Andina	Antioquia	Rio Negro	urbano	4	1	1	1	0	0	1	1	0	0	0	0	0	0	0	0	0	0
325	ANT-017	Andina	Antioquia	Rio Negro	urbano	4	1	1	1	0	1	1	1	0	0	0	0	0	0	0	0	0	0
326	ANT-018	Andina	Antioquia	Rio Negro	urbano	4	0	0	0	1	1	1	1	1	0	0	0	0	0	0	0	0	0
327	ANT-019	Andina	Antioquia	Rio Negro	urbano	3	0	0	1	1	1	1	1	1	0	0	0	0	0	0	0	0	0
328	ANT-020	Andina	Antioquia	Rio Negro	urbano	10	0	0	0	0	1	1	1	1	0	0	0	0	0	0	0	0	0
329	ANT-021	Andina	Antioquia	Rio Negro	urbano	5	1	1	1	0	1	1	0	0	0	0	0	0	0	0	0	0	0
330	ANT-022	Andina	Antioquia	Rio Negro	urbano	3	0	0	0	0	1	1	1	0	1	0	0	0	0	0	0	0	0
331	ANT-023	Andina	Antioquia	Rio Negro	urbano	11	0	0	0	1	1	1	1	0	0	0	0	0	0	0	0	0	0
332	ANT-024	Andina	Antioquia	Rio Negro	urbano	3.2	1	0	1	0	1	1	0	1	0	0	0	0	0	0	0	0	0
333	ANT-025	Andina	Antioquia	Rio Negro	urbano	4.2	0	0	0	0	1	1	1	0	1	0	0	0	0	0	0	0	C.andersoni
334	ANT-026	Andina	Antioquia	Rio Negro	urbano	3.1	1	1	1	0	1	1	0	1	0	0	0	0	0	0	0	0	0
335	ANT-027	Andina	Antioquia	Rio Negro	urbano	4	0	0	0	0	0	1	1	0	0	0	0	0	0	0	0	0	0
336	ANT-028	Andina	Antioquia	Rio Negro	urbano	3.11	1	1	1	1	1	1	1	1	0	0	0	0	0	0	0	0	0
337	ANT-029	Andina	Antioquia	Amalfi	urbano	4.4	0	0	0	0	1	1	1	1	0	0	0	0	0	0	0	0	0
338	ANT-030	Andina	Antioquia	Amalfi	urbano	4.4	0	0	0	1	1	1	0	1	0	0	0	0	0	0	0	0	0
339	ANT-031	Andina	Antioquia	Amalfi	urbano	4.7	0	1	0	0	1	1	1	1	0	0	0	0	0	0	0	0	0
340	ANT-032	Andina	Antioquia	Amalfi	urbano	1.5	1	0	0	0	0	1	1	1	1	0	0	0	0	0	0	0	C. muris
341	ANT-033	Andina	Antioquia	Amalfi	rural	5	0	0	0	1	1	1	1	1	0	0	0	0	0	0	0	0	0
342	ANT-034	Andina	Antioquia	Amalfi	rural	4	0	0	0	0	1	1	1	1	0	0	0	0	0	0	0	0	0
343	ANT-035	Andina	Antioquia	Amalfi	rural	3	0	1	1	1	1	1	1	1	0	0	0	0	0	0	0	0	0
344	ANT-036	Andina	Antioquia	Amalfi	rural	4	1	1	1	0	1	1	1	1	0	0	0	0	0	0	0	0	0
345	ANT-037	Andina	Antioquia	Amalfi	rural	3	1	0	1	0	1	1	1	1	0	0	0	0	0	0	0	0	0
346	ANT-038	Andina	Antioquia	Amalfi	rural	4	0	0	0	1	0	1	1	0	0	0	0	0	0	0	0	0	0
347	ANT-039	Andina	Antioquia	Bello	urbano	3	1	1	1	0	1	1	1	1	0	0	0	0	0	0	0	0	0
348	ANT-040	Andina	Antioquia	Bello	urbano	4	0	0	0	0	1	1	1	1	0	0	0	0	0	0	0	0	0
349	ANT-041	Andina	Antioquia	Bello	urbano	3	1	0	1	0	1	1	1	1	0	0	0	0	0	0	0	0	0
350	ANT-042	Andina	Antioquia	Bello	urbano	3	0	1	0	0	0	1	0	0	0	0	0	0	0	0	0	0	0
351	ANT-043	Andina	Antioquia	Caldas	urbano	4	1	1	1	1	1	1	0	1	0	0	0	0	0	0	0	0	0
352	ANT-044	Andina	Antioquia	Caldas	urbano	2	0	0	0	0	1	1	1	0	0	0	0	0	0	0	0	0	0
353	ANT-045	Andina	Antioquia	Caldas	urbano	4	0	1	0	1	1	1	1	1	0	0	0	0	0	0	0	0	0
354	ANT-046	Andina	Antioquia	Caldas	urbano	3	0	0	1	0	1	1	1	1	0	0	0	0	0	0	0	0	0
355	ANT-047	Andina	Antioquia	El Santuario	urbano	10	1	0	0	0	1	0	NA	NA	NA	NA	NA	NA	NA	NA	NA	NA	NA
356	ANT-048	Andina	Antioquia	El Santuario	urbano	5	0	0	0	1	0	1	1	1	1	0	0	0	0	0	0	0	C. ubiquitum
357	ANT-049	Andina	Antioquia	El Santuario	urbano	3	1	1	1	0	1	1	1	0	0	0	0	0	0	0	0	0	0
358	ANT-050	Andina	Antioquia	El Santuario	rural	1	0	0	0	0	1	1	0	1	0	0	0	0	0	0	0	0	0
359	BOL-010	Caribe	Bolívar	Mompos		7						1	1	1	1	0	0	0	BIV	BIII	1	4	C. hominis
360	BOL-011	Caribe	Bolívar	Mompos		11						1	1	1	0	0	0	0	0	0	3	47	0
361	BOL-012	Caribe	Bolívar	Mompos		14						1	1	1	0	0	0	0	0	0	1	4	0
362	BOL-013	Caribe	Bolívar	Mompos		70						1	0	1	0	0	0	0	0	0	2	9	0
363	BOL-014	Caribe	Bolívar	Mompos		9						1	1	1	0	0	0	0	0	0	1	88	0
364	BOL-015	Caribe	Bolívar	Mompos		42						1	1	1	0	0	0	0	0	0	1	88	0
365	BOL-016	Caribe	Bolívar	Mompos		2						1	1	1	0	1	0	0	0	BIII	1	4	0
366	BOL-017	Caribe	Bolívar	Mompos		13						1	1	1	0	0	0	0	0	0	1	88	0
367	BOL-018	Caribe	Bolívar	Mompos		1						1	1	1	0	0	0	0	BIV	BIII	0	0	0
368	BOL-019	Caribe	Bolívar	Mompos		12						1	1	1	0	1	0	0	0	0	3	52	0
369	BOL-020	Caribe	Bolívar	Mompos		4						1	1	1	0	0	0	0	0	0	3	34	0
370	BOL-021	Caribe	Bolívar	Mompos		9						1	1	1	0	0	0	0	0	0	1	4	0
371	BOL-022	Caribe	Bolívar	Mompos		7						1	1	1	0	0	0	0	BIII	BIII	2	11	0
372	BOL-023	Caribe	Bolívar	Mompos		6						1	1	1	0	1	1	0	BIII	BIV	2	9	0
373	BOL-024	Caribe	Bolívar	Mompos		10						1	1	1	1	0	0	0	BIV	BIII	2	9	0
374	BOL-025	Caribe	Bolívar	Mompos		8						1	1	1	0	0	0	0	0	0	3	34	0
375	BOL-026	Caribe	Bolívar	Mompos		15						1	1	1	0	1	1	0	0	0	2	9	0
376	BOL-027	Caribe	Bolívar	Mompos		30						1	1	1	0	0	0	0	0	0	3	34	0
377	BOL-028	Caribe	Bolívar	Mompos		12						1	1	1	0	1	0	0	BIII	BIII	0	0	0
378	BOL-029	Caribe	Bolívar	Mompos		5						1	0	1	0	0	0	0	0	0	2	9	0
379	BOL-030	Caribe	Bolívar	Mompos		12						1	1	1	0	0	0	0	BIV	BIII	1	88	0
380	BOL-031	Caribe	Bolívar	Mompos		8						1	1	1	0	0	0	0	0	0	1	4	0
381	BOL-032	Caribe	Bolívar	Mompos		15						1	1	1	1	0	0	0	BIV	BIII	1	4	C. muris
382	BOL-033	Caribe	Bolívar	Mompos		2						1	0	0	0	0	0	0	0	0	0	0	0
383	BOL-034	Caribe	Bolívar	Mompos		5						1	1	1	0	0	0	0	BIV	BIII	0	0	0
384	BOL-035	Caribe	Bolívar	Mompos		12						1	1	1	0	0	0	0	0	0	1	4	0
385	BOL-036	Caribe	Bolívar	Mompos		8						1	1	1	0	0	0	0	BIII	0	2	12	0
386	BOL-037	Caribe	Bolívar	Mompos		3						1	1	1	0	0	0	0	0	0	2	15	0
387	BOL-038	Caribe	Bolívar	Mompos		2						1	1	1	0	0	0	0	0	0	0	0	0
388	BOL-039	Caribe	Bolívar	Mompos		3						1	1	1	0	0	0	0	BIV	BIV	0	0	0
389	BOY-001	Andina	Boyacá	Paipa	urbano	3	1	0	0	0	1	1	1	1	0	0	0	0	0	0	0	0	0
390	BOY-002	Andina	Boyacá	Paipa	urbano	2	0	0	1	0	1	1	1	0	0	0	0	0	0	0	0	0	0
391	BOY-003	Andina	Boyacá	Paipa	urbano	4	1	1	0	1	1	1	1	0	1	0	0	0	0	0	0	0	C. muris
392	BOY-004	Andina	Boyacá	Paipa	urbano	7	1	0	1	0	1	1	1	1	0	0	0	0	0	0	0	0	0
393	BOY-005	Andina	Boyacá	Paipa	urbano	4	0	0	1	0	1	1	1	0	0	0	0	0	0	0	0	0	0
394	BOY-006	Andina	Boyacá	Paipa	urbano	2	0	0	0	0	1	1	1	0	0	0	0	0	0	0	0	0	0
395	BOY-007	Andina	Boyacá	Paipa	urbano	4	0	0	1	0	1	1	1	0	0	0	0	0	0	0	0	0	0
396	BOY-008	Andina	Boyacá	Paipa	urbano	4	1	1	0	1	1	1	1	0	0	0	0	0	0	0	0	0	0
397	BOY-009	Andina	Boyacá	Paipa	urbano	2	0	0	0	0	0	1	1	0	0	0	0	0	0	0	0	0	0
398	BOY-010	Andina	Boyacá	Paipa	urbano	2	0	0	1	0	1	1	1	0	0	0	0	0	0	0	0	0	0
399	BOY-011	Andina	Boyacá	Paipa	urbano	2	1	0	0	0	0	1	0	1	0	0	0	0	0	0	0	0	0
400	BOY-012	Andina	Boyacá	Paipa	urbano	3	0	0	0	0	0	1	0	0	0	0	0	0	0	0	0	0	0
401	BOY-013	Andina	Boyacá	Paipa	urbano	5	0	1	1	0	1	1	1	1	0	0	0	0	0	0	0	0	0
402	BOY-014	Andina	Boyacá	Paipa	rural	4	1	0	0	0	1	1	1	0	0	0	0	0	0	0	0	0	0
403	BOY-015	Andina	Boyacá	Paipa	rural	4	0	0	1	0	1	1	1	0	0	0	0	0	0	0	0	0	0
404	BOY-016	Andina	Boyacá	Paipa	rural	4	1	0	1	0	1	1	1	0	0	0	0	0	0	0	0	0	0
405	BOY-017	Andina	Boyacá	Paipa	rural	4	1	0	0	0	0	1	1	0	0	0	0	0	0	0	0	0	0
406	BOY-018	Andina	Boyacá	Paipa	rural	3	0	1	1	1	0	1	1	0	1	0	0	0	0	0	0	0	C. andersoni
407	BOY-019	Andina	Boyacá	Paipa	rural	10	0	1	0	0	0	1	1	0	0	0	0	0	0	0	0	0	0
408	BOY-020	Andina	Boyacá	Villa de Leyva	urbano	5	0	0	1	0	1	1	1	1	0	0	0	0	0	0	0	0	0
409	BOY-021	Andina	Boyacá	Villa de Leyva	urbano	3	1	0	0	0	0	1	0	0	0	0	0	0	0	0	0	0	0
410	BOY-022	Andina	Boyacá	Villa de Leyva	urbano	11	0	0	0	0	1	1	0	1	0	0	0	0	0	0	0	0	0
411	BOY-023	Andina	Boyacá	Villa de Leyva	urbano	3.2	0	1	1	1	1	1	1	0	0	0	0	0	0	0	0	0	0
412	BOY-024	Andina	Boyacá	Villa de Leyva	urbano	4.2	1	0	0	0	1	1	1	1	0	0	0	0	0	0	0	0	0
413	BOY-025	Andina	Boyacá	Villa de Leyva	urbano	3.1	0	0	1	0	1	1	0	0	0	0	0	0	0	0	0	0	0
414	BOY-026	Andina	Boyacá	Villa de Leyva	urbano	4	0	0	0	0	0	1	1	1	0	0	0	0	0	0	0	0	0
415	BOY-027	Andina	Boyacá	Villa de Leyva	urbano	3.11	0	0	1	0	1	1	1	0	0	0	0	0	0	0	0	0	0
416	BOY-028	Andina	Boyacá	Villa de Leyva	rural	4.4	1	1	0	1	0	1	1	0	0	0	0	0	0	0	0	0	0
417	BOY-029	Andina	Boyacá	Villa de Leyva	rural	4.4	0	0	1	0	0	1	0	0	0	0	0	0	0	0	0	0	0
418	BOY-030	Andina	Boyacá	Villa de Leyva	rural	4.7	0	1	0	1	1	1	1	0	0	0	0	0	0	0	0	0	0
419	BOY-031	Andina	Boyacá	Arcabuco	urbano	1.5	0	0	0	0	1	1	0	1	0	0	0	0	0	0	0	0	0
420	BOY-032	Andina	Boyacá	Arcabuco	urbano	5	0	0	0	0	0	1	0	0	0	0	0	0	0	0	0	0	0
421	BOY-033	Andina	Boyacá	Arcabuco	urbano	4	0	1	0	1	0	1	1	1	0	0	0	0	0	0	0	0	0
422	BOY-034	Andina	Boyacá	Arcabuco	urbano	3	0	0	1	0	1	1	0	0	0	0	0	0	0	0	0	0	0
423	BOY-035	Andina	Boyacá	Arcabuco	urbano	4	1	1	0	0	1	1	1	0	0	0	0	0	0	0	0	0	0
424	BOY-036	Andina	Boyacá	Arcabuco	urbano	3	0	0	1	0	1	1	0	1	0	0	0	0	0	0	0	0	0
425	BOY-037	Andina	Boyacá	Tuta	urbano	4	1	0	0	0	1	1	0	0	0	0	0	0	0	0	0	0	0
426	BOY-038	Andina	Boyacá	Tunja	urbano	3	0	1	1	1	1	1	0	0	0	0	0	0	0	0	0	0	0
427	BOY-039	Andina	Boyacá	Tunja	urbano	4	1	0	0	0	0	1	0	0	0	0	0	0	0	0	0	0	0
428	BOY-040	Andina	Boyacá	Tunja	urbano	3	0	0	1	0	1	1	1	1	0	0	0	0	0	0	0	0	0
429	BOY-041	Andina	Boyacá	Tunja	urbano	3	1	0	0	0	0	1	1	0	0	0	0	0	0	0	0	0	0
430	BOY-042	Andina	Boyacá	Tunja	urbano	4	0	0	1	0	1	1	1	1	0	0	0	0	0	0	0	0	0
431	BOY-043	Andina	Boyacá	Tunja	urbano	4	1	1	0	1	0	1	1	0	0	0	0	0	0	0	0	0	0
432	BOY-044	Andina	Boyacá	Tunja	urbano	4	0	0	1	0	0	1	1	1	0	0	0	0	0	0	0	0	0
433	BOY-045	Andina	Boyacá	Tunja	urbano	3	0	1	1	1	1	1	0	1	0	0	0	0	0	0	0	0	0
434	BOY-046	Andina	Boyacá	Tunja	urbano	4	0	0	0	0	1	1	1	0	0	0	0	0	0	0	0	0	0
435	BOY-047	Andina	Boyacá	Tunja	urbano	3	1	0	0	0	1	1	0	0	0	0	0	0	0	0	0	0	0
436	BOY-048	Andina	Boyacá	Tunja	urbano	4	0	1	1	0	1	1	1	0	1	0	0	0	0	0	0	0	0
437	BOY-049	Andina	Boyacá	Tunja	urbano	3	1	0	0	0	1	1	1	0	0	0	0	0	0	0	0	0	0
438	BOY-050	Andina	Boyacá	Tunja	urbano	3	0	0	1	0	1	1	1	0	0	0	0	0	0	0	0	0	0
439	CAS-001	Orinoquía	Casanare	Pore	rural	2.5						1	0	1	0	0	0	0	0	0	1	141	0
440	CAS-002	Orinoquía	Casanare	Pore	rural	3						1	0	1	0	0	0	0	0	0	0	0	0
441	CAS-003	Orinoquía	Casanare	Pore	rural	4						1	0	1	0	0	0	0	0	0	3	136	0
442	CAS-004	Orinoquía	Casanare	Pore	rural	3.5						1	0	1	0	0	0	0	0	0	9	129	0
443	CAS-005	Orinoquía	Casanare	Pore	rural	2						1	0	1	0	0	0	0	0	0	4	133	0
444	CAS-006	Orinoquía	Casanare	Pore	rural	1.5						1	0	1	0	0	0	0	0	0	1	4	0
445	CAS-007	Orinoquía	Casanare	Pore	rural	6						1	0	1	0	0	0	0	0	0	1	4	0
446	CAS-008	Orinoquía	Casanare	Pore	rural	5						1	0	1	0	0	0	0	0	0	2	12	0
447	CAS-009	Orinoquía	Casanare	Pore	rural	4						1	1	1	0	0	0	0	0	0	1	4	0
448	CAS-010	Orinoquía	Casanare	Pore	rural	7						1	1	1	0	0	0	0	BIV	BIII	1	4	0
449	CAS-011	Orinoquía	Casanare	Pore	rural	9						1	1	1	0	0	0	0	BIV	BIII	0	0	0
450	CAS-012	Orinoquía	Casanare	Pore	rural	11						1	1	1	0	0	0	0	0	0	1	4	0
451	CAS-013	Orinoquía	Casanare	Pore	rural	10						1	0	1	0	0	0	0	0	0	0	0	0
452	CAS-014	Orinoquía	Casanare	Pore	rural	8						1	1	1	0	0	0	0	0	0	1	4	0
453	CAS-015	Orinoquía	Casanare	Pore	rural	12						1	1	1	0	0	0	0	0	0	1	4	0
454	CAS-016	Orinoquía	Casanare	Pore	rural	6.5						1	1	1	0	0	0	0	0	0	2	64	0
455	CAS-017	Orinoquía	Casanare	Pore	rural	8						1	1	1	0	0	0	0	0	0	1	4	0
456	CAS-018	Orinoquía	Casanare	Pore	rural	9						1	1	1	0	1	0	0	BIII	BIV	3	57	0
457	CAS-019	Orinoquía	Casanare	Pore	rural	12						1	1	1	0	0	0	0	BIV	0	0	0	0
458	CAS-020	Orinoquía	Casanare	Pore	rural	14						0	NA	NA	NA	NA	NA	NA	NA	NA	NA	NA	NA
459	CAS-021	Orinoquía	Casanare	Pore	rural	13						0	NA	NA	NA	NA	NA	NA	NA	NA	NA	NA	NA
460	CAS-022	Orinoquía	Casanare	Pore	rural	32						0	NA	NA	NA	NA	NA	NA	NA	NA	NA	NA	NA
461	CAS-023	Orinoquía	Casanare	Pore	rural	21						0	NA	NA	NA	NA	NA	NA	NA	NA	NA	NA	NA
462	CAS-024	Orinoquía	Casanare	Pore	rural	19						0	NA	NA	NA	NA	NA	NA	NA	NA	NA	NA	NA
463	CAS-025	Orinoquía	Casanare	Pore	rural	2						0	NA	NA	NA	NA	NA	NA	NA	NA	NA	NA	NA
464	CAS-026	Orinoquía	Casanare	Pore	rural	3.5						1	0	1	0	0	0	0	0	0	0	0	0
465	CAS-027	Orinoquía	Casanare	Pore	rural	3						1	0	1	0	0	0	0	0	0	1	4	0
466	CAS-028	Orinoquía	Casanare	Pore	rural	4.5						0	NA	NA	NA	NA	NA	NA	NA	NA	NA	NA	NA
467	CAS-029	Orinoquía	Casanare	Pore	rural	6						1	1	1	0	0	0	0	0	0	0	0	0
468	CAS-030	Orinoquía	Casanare	Pore	rural	2						1	1	1	0	0	0	0	0	AII	2	9	0
469	CAS-031	Orinoquía	Casanare	Pore	rural	30						0	NA	NA	NA	NA	NA	NA	NA	NA	NA	NA	NA
470	CAS-032	Orinoquía	Casanare	Pore	rural	25						0	NA	NA	NA	NA	NA	NA	NA	NA	NA	NA	NA
471	CAS-033	Orinoquía	Casanare	Pore	rural	23						1	1	1	0	0	0	0	0	BIV	3	36	0
472	CAS-034	Orinoquía	Casanare	Pore	rural	31						1	1	1	0	0	0	0	0	0	1	4	0
473	CAS-035	Orinoquía	Casanare	Pore	rural	28						1	1	1	0	0	0	0	0	0	3	34	0
474	CAS-036	Orinoquía	Casanare	Pore	rural	20						1	1	0	0	1	0	0	BIV	BIV	0	0	0
475	CAS-037	Orinoquía	Casanare	Yopal	rural	1.5						1	1	1	0	0	0	0	0	BIV	0	0	0
476	CAS-038	Orinoquía	Casanare	Yopal	rural	2						0	NA	NA	NA	NA	NA	NA	NA	NA	NA	NA	NA
477	CAS-039	Orinoquía	Casanare	Yopal	rural	3						0	NA	NA	NA	NA	NA	NA	NA	NA	NA	NA	NA
478	CAS-040	Orinoquía	Casanare	Yopal	rural	4						0	NA	NA	NA	NA	NA	NA	NA	NA	NA	NA	NA
479	CAS-041	Orinoquía	Casanare	Yopal	rural	5						1	1	1	0	0	0	0	0	0	1	4	0
480	CAS-042	Orinoquía	Casanare	Yopal	rural	1						1	1	1	0	1	0	0	0	BIV	1	4	0
481	CAS-043	Orinoquía	Casanare	Yopal	rural	3						1	1	1	0	0	0	0	?	BIV	3	36	0
482	CAS-044	Orinoquía	Casanare	Yopal	rural	2						0	NA	NA	NA	NA	NA	NA	NA	NA	NA	NA	NA
483	CAS-045	Orinoquía	Casanare	Yopal	rural	2.5						1	1	1	0	0	0	0	0	0	3	34	0
484	CAS-046	Orinoquía	Casanare	Yopal	rural	4						0	NA	NA	NA	NA	NA	NA	NA	NA	NA	NA	NA
485	CAS-047	Orinoquía	Casanare	Yopal	rural	6						1	1	1	0	1	0	0	BIII	BIII	3	36	0
486	CAS-048	Orinoquía	Casanare	Tamara	rural	17						0	NA	NA	NA	NA	NA	NA	NA	NA	NA	NA	NA
487	CAS-049	Orinoquía	Casanare	Tamara	rural	11						0	NA	NA	NA	NA	NA	NA	NA	NA	NA	NA	NA
488	CAS-050	Orinoquía	Casanare	Tamara	rural	30						1	1	1	0	0	0	0	0	0	3	36	0
489	CAS-051	Orinoquía	Casanare	Tamara	rural	60						1	0	1	0	0	0	0	0	0	3	34	0
490	CAS-052	Orinoquía	Casanare	Tamara	rural	45						0	NA	NA	NA	NA	NA	NA	NA	NA	NA	NA	NA
491	CAS-053	Orinoquía	Casanare	Tamara	rural	20						1	0	1	0	0	0	0	0	0	3	34	0
492	COR-M01	Caribe	Córdoba									1	1	1	0	0	0	0	BIV	BIII	2	9	0
493	COR-M02	Caribe	Córdoba									0	NA	NA	NA	NA	NA	NA	NA	NA	NA	NA	NA
494	COR-M03	Caribe	Córdoba									1	1	1	0	0	0	0	0	0	0	0	0
495	COR-M04	Caribe	Córdoba									1	1	1	0	0	0	0	G	BIII	0	0	0
496	COR-M05	Caribe	Córdoba									1	1	1	0	0	0	0	0	0	0	0	0
497	COR-M06	Caribe	Córdoba									1	1	1	0	0	0	0	0	0	0	0	0
498	COR-M07	Caribe	Córdoba									1	1	1	0	0	0	0	G	AII	0	0	0
499	COR-M08	Caribe	Córdoba									1	1	1	1	0	0	0	G	BIV	8	21	C. felis
500	CUN-001	Andina	Cundinamarca	Bogotá	urbano	3	0	0	1	0	1	1	0	1	0	0	0	0	0	0	0	0	0
501	CUN-002	Andina	Cundinamarca	Bogotá	urbano	8	1	0	0	1	0	1	0	0	0	0	0	0	0	0	0	0	0
502	CUN-003	Andina	Cundinamarca	Bogotá	urbano	5	0	1	1	1	1	1	0	1	0	0	0	0	0	0	0	0	0
503	CUN-004	Andina	Cundinamarca	Bogotá	urbano	1	1	0	1	0	0	1	1	0	0	0	0	0	0	0	0	0	0
504	CUN-005	Andina	Cundinamarca	Bogotá	urbano	4	1	0	0	0	1	1	0	1	0	0	0	0	0	0	0	0	0
505	CUN-006	Andina	Cundinamarca	Bogotá	urbano	6	0	1	0	0	1	1	1	1	0	0	0	0	0	0	0	0	0
506	CUN-007	Andina	Cundinamarca	Bogotá	urbano	11	1	0	0	1	0	1	1	1	0	0	0	0	0	0	0	0	0
507	CUN-008	Andina	Cundinamarca	Bogotá	urbano	3	0	1	1	0	1	1	0	1	0	0	0	0	0	0	0	0	0
508	CUN-009	Andina	Cundinamarca	Bogotá	urbano	8	0	0	0	0	1	1	0	1	0	0	0	0	0	0	0	0	0
509	CUN-010	Andina	Cundinamarca	Bogotá	urbano	5	1	0	0	1	1	1	0	1	0	0	0	0	0	0	0	0	0
510	CUN-011	Andina	Cundinamarca	Soacha	urbano	2	0	1	1	0	1	1	1	0	0	0	0	0	0	0	0	0	0
511	CUN-012	Andina	Cundinamarca	Soacha	urbano	8	0	0	0	0	1	1	1	1	0	0	0	0	0	0	0	0	0
512	CUN-013	Andina	Cundinamarca	Soacha	urbano	1	1	0	0	1	1	1	1	1	0	0	0	0	0	0	0	0	0
513	CUN-014	Andina	Cundinamarca	Soacha	urbano	3	0	1	1	0	1	1	0	1	0	0	0	0	0	0	0	0	0
514	CUN-015	Andina	Cundinamarca	Soacha	urbano	4	1	0	0	0	1	1	1	1	0	0	0	0	0	0	0	0	0
515	CUN-016	Andina	Cundinamarca	Soacha	urbano	7	1	1	1	1	0	1	1	1	0	0	0	0	0	0	0	0	0
516	CUN-017	Andina	Cundinamarca	Soacha	urbano	10	0	1	1	0	0	1	1	1	0	0	0	0	0	0	0	0	0
517	CUN-018	Andina	Cundinamarca	Soacha	urbano	5	1	0	0	0	1	1	1	1	0	0	0	0	0	0	0	0	0
518	CUN-019	Andina	Cundinamarca	Soacha	urbano	8	0	0	0	0	1	1	0	1	0	0	0	0	0	0	0	0	0
519	CUN-020	Andina	Cundinamarca	Soacha	urbano	6	1	0	0	1	1	1	0	0	0	0	0	0	0	0	0	0	0
520	CUN-021	Andina	Cundinamarca	Soacha	urbano	4	0	1	1	0	0	1	0	1	0	0	0	0	0	0	0	0	0
521	CUN-022	Andina	Cundinamarca	Fómeque	urbano	5	0	0	0	1	1	1	1	1	0	0	0	0	0	0	0	0	0
522	CUN-023	Andina	Cundinamarca	Fómeque	urbano	7	1	0	0	1	1	1	0	0	0	0	0	0	0	0	0	0	0
523	CUN-024	Andina	Cundinamarca	Fómeque	urbano	2	0	0	1	0	1	1	1	1	0	0	0	0	0	0	0	0	0
524	CUN-025	Andina	Cundinamarca	Fómeque	urbano	9	1	0	0	1	0	1	1	0	0	0	0	0	0	0	0	0	0
525	CUN-026	Andina	Cundinamarca	Fómeque	urbano	10	0	1	0	0	1	1	1	0	1	0	0	0	0	0	0	0	0
526	CUN-027	Andina	Cundinamarca	Fómeque	urbano	13	1	0	0	1	1	1	0	1	0	0	0	0	0	0	0	0	0
527	CUN-028	Andina	Cundinamarca	Fómeque	rural	7	0	1	1	0	1	1	1	1	0	0	0	0	0	0	0	0	0
528	CUN-029	Andina	Cundinamarca	Fómeque	rural	4	1	0	0	0	0	1	1	1	0	0	0	0	0	0	0	0	0
529	CUN-030	Andina	Cundinamarca	Fómeque	rural	9	0	0	0	1	1	1	1	1	0	0	0	0	0	0	0	0	0
530	CUN-031	Andina	Cundinamarca	Fómeque	rural	2	0	1	0	0	0	1	0	1	0	0	0	0	0	0	0	0	0
531	CUN-032	Andina	Cundinamarca	Fómeque	rural	5	0	0	0	1	1	1	1	0	0	0	0	0	0	0	0	0	0
532	CUN-033	Andina	Cundinamarca	Fómeque	rural	8	0	0	0	0	1	1	1	0	0	0	0	0	0	0	0	0	0
533	CUN-034	Andina	Cundinamarca	San Francisco	rural	4	1	0	0	1	0	1	1	1	0	0	0	0	0	0	0	0	0
534	CUN-035	Andina	Cundinamarca	San Francisco	rural	3	0	1	1	0	1	1	1	1	0	0	0	0	0	0	0	0	0
535	CUN-036	Andina	Cundinamarca	San Francisco	rural	12	1	1	0	1	0	1	0	1	0	0	0	0	0	0	0	0	0
536	CUN-037	Andina	Cundinamarca	San Francisco	rural	6	0	0	1	0	1	1	0	0	0	0	0	0	0	0	0	0	0
537	CUN-038	Andina	Cundinamarca	Chaguaní	urbano	7	1	0	0	1	1	0	NA	NA	NA	NA	NA	NA	NA	NA	NA	NA	NA
538	CUN-039	Andina	Cundinamarca	Chaguaní	urbano	6	0	1	1	0	1	1	0	0	0	0	0	0	0	0	0	0	0
539	CUN-040	Andina	Cundinamarca	Chaguaní	urbano	2	1	0	0	1	0	1	1	0	0	0	0	0	0	0	0	0	0
540	CUN-041	Andina	Cundinamarca	Chaguaní	urbano	3	0	1	1	0	1	1	0	0	0	0	0	0	0	0	0	0	0
541	CUN-042	Andina	Cundinamarca	Chaguaní	urbano	9	1	0	0	1	0	1	0	0	0	0	0	0	0	0	0	0	0
542	CUN-043	Andina	Cundinamarca	Chaguaní	urbano	2	0	1	1	0	1	1	1	0	0	0	0	0	0	0	0	0	0
543	CUN-044	Andina	Cundinamarca	Chaguaní	urbano	7	1	0	0	0	0	1	1	1	0	0	0	0	0	0	0	0	0
544	CUN-045	Andina	Cundinamarca	Chaguaní	urbano	4	1	1	0	0	1	1	0	0	0	0	0	0	0	0	0	0	0
545	CUN-046	Andina	Cundinamarca	Chaguaní	urbano	5	0	0	0	1	1	1	1	1	0	0	0	0	0	0	0	0	0
546	CUN-047	Andina	Cundinamarca	Chaguaní	urbano	7	0	0	1	0	1	1	0	1	0	0	0	0	0	0	0	0	0
547	CUN-048	Andina	Cundinamarca	Chaguaní	urbano	3.5	1	0	0	1	1	1	1	1	0	0	0	0	0	0	0	0	0
548	CUN-049	Andina	Cundinamarca	Chaguaní	urbano	4.2	0	1	1	0	1	1	1	0	0	0	0	0	0	0	0	0	0
549	CUN-050	Andina	Cundinamarca	Chaguaní	urbano	2.3	1	0	0	0	1	1	0	0	0	0	0	0	0	0	0	0	0
550	ECF-001	Andina	Eje Cafetero	Calaracá	urbano	4.2	0	0	0	0	0	1	1	1	0	0	0	0	0	0	0	0	0
551	ECF-002	Andina	Eje Cafetero	Calaracá	urbano	4.7	0	1	1	1	1	1	1	1	0	0	0	0	0	0	0	0	0
552	ECF-003	Andina	Eje Cafetero	Calaracá	urbano	3.2	1	0	0	0	1	1	1	1	0	0	0	0	0	0	0	0	0
553	ECF-004	Andina	Eje Cafetero	Calaracá	urbano	3.1	0	1	1	0	1	1	1	1	0	0	0	0	0	0	0	0	0
554	ECF-005	Andina	Eje Cafetero	Calaracá	urbano	3.11	0	1	1	0	1	1	0	0	0	0	0	0	0	0	0	0	0
555	ECF-006	Andina	Eje Cafetero	Calaracá	urbano	4.4	1	0	0	0	1	1	1	1	0	0	0	0	0	0	0	0	0
556	ECF-007	Andina	Eje Cafetero	Calaracá	urbano	4.4	0	1	1	1	1	1	0	1	0	0	0	0	0	0	0	0	0
557	ECF-008	Andina	Eje Cafetero	Calaracá	urbano	4.7	1	0	0	0	1	1	1	1	0	0	0	0	0	0	0	0	0
558	ECF-009	Andina	Eje Cafetero	Calaracá	urbano	1.5	0	0	0	0	0	1	1	1	0	0	0	0	0	0	0	0	0
559	ECF-010	Andina	Eje Cafetero	Calaracá	urbano	5	0	1	1	0	1	1	0	1	0	0	0	0	0	0	0	0	0
560	ECF-011	Andina	Eje Cafetero	Calaracá	urbano	4	1	0	0	0	1	1	1	1	0	0	0	0	0	0	0	0	0
561	ECF-012	Andina	Eje Cafetero	Calaracá	urbano	4	0	0	0	0	0	1	0	0	0	0	0	0	0	0	0	0	0
562	ECF-013	Andina	Eje Cafetero	Calaracá	urbano	3	0	1	1	0	1	1	1	1	0	0	0	0	0	0	0	0	0
563	ECF-014	Andina	Eje Cafetero	Calaracá	urbano	4	1	0	0	0	1	1	1	0	0	0	0	0	0	0	0	0	0
564	ECF-015	Andina	Eje Cafetero	Calaracá	rural	3	0	1	1	0	1	1	1	1	0	0	0	0	0	0	0	0	0
565	ECF-016	Andina	Eje Cafetero	Calaracá	rural	3	1	1	1	0	1	1	1	0	0	0	0	0	0	0	0	0	0
566	ECF-017	Andina	Eje Cafetero	Calaracá	rural	3	1	0	0	1	1	1	1	1	0	0	0	0	0	0	0	0	0
567	ECF-018	Andina	Eje Cafetero	Calaracá	rural	4	0	1	1	0	1	1	1	1	0	0	0	0	0	0	0	0	0
568	ECF-019	Andina	Eje Cafetero	Calaracá	rural	4	0	0	0	0	1	1	1	1	0	0	0	0	0	0	0	0	0
569	ECF-020	Andina	Eje Cafetero	Calaracá	rural	3	0	1	1	0	1	1	1	1	0	0	0	0	0	0	0	0	0
570	ECF-021	Andina	Eje Cafetero	Corregimiento Barcelona		2.6	1	0	0	0	0	1	0	1	0	0	0	0	0	0	0	0	0
571	ECF-022	Andina	Eje Cafetero	Corregimiento Barcelona		3	0	0	0	1	1	1	1	1	0	0	0	0	0	0	0	0	0
572	ECF-023	Andina	Eje Cafetero	Corregimiento Barcelona		2	0	1	1	0	1	1	1	1	0	0	0	0	0	0	0	0	0
573	ECF-024	Andina	Eje Cafetero	Corregimiento Barcelona		2	0	0	0	0	1	1	1	1	0	0	0	0	0	0	0	0	0
574	ECF-025	Andina	Eje Cafetero	Corregimiento Barcelona		4	0	1	1	0	1	1	1	1	0	0	0	0	0	0	0	0	0
575	ECF-026	Andina	Eje Cafetero	Corregimiento Barcelona		4	1	0	0	0	1	1	1	1	0	0	0	0	0	0	0	0	0
576	ECF-027	Andina	Eje Cafetero	Armenia	urbano	2	0	1	1	1	1	1	1	1	0	0	0	0	0	0	0	0	0
577	ECF-028	Andina	Eje Cafetero	Armenia	urbano	4	1	0	0	0	1	1	1	1	0	0	0	0	0	0	0	0	0
578	ECF-029	Andina	Eje Cafetero	Armenia	urbano	3	0	1	1	1	0	1	0	0	0	0	0	0	0	0	0	0	0
579	ECF-030	Andina	Eje Cafetero	Armenia	urbano	5	0	0	0	0	1	1	1	1	0	0	0	0	0	0	0	0	0
580	ECF-031	Andina	Eje Cafetero	Armenia	urbano	4	1	0	0	0	1	1	0	1	0	0	0	0	0	0	0	0	0
581	ECF-032	Andina	Eje Cafetero	Armenia	urbano	4	0	0	0	1	0	1	1	1	0	0	0	0	0	0	0	0	0
582	ECF-033	Andina	Eje Cafetero	Armenia	urbano	4	0	0	0	0	0	1	0	0	0	0	0	0	0	0	0	0	0
583	ECF-034	Andina	Eje Cafetero	Armenia	urbano	4.2	0	1	1	0	1	1	1	1	0	0	0	0	0	0	0	0	0
584	ECF-035	Andina	Eje Cafetero	Armenia	urbano	4.7	1	0	0	0	1	1	1	1	0	0	0	0	0	0	0	0	0
585	ECF-036	Andina	Eje Cafetero	Armenia	urbano	3.2	1	1	1	0	1	1	1	1	0	0	0	0	0	0	0	0	0
586	ECF-037	Andina	Eje Cafetero	Armenia	urbano	3.1	0	0	0	1	1	1	1	1	0	0	0	0	0	0	0	0	0
587	ECF-038	Andina	Eje Cafetero	Armenia	urbano	3.11	0	1	1	0	0	1	1	0	0	0	0	0	0	0	0	0	0
588	ECF-039	Andina	Eje Cafetero	Armenia	urbano	4.4	1	0	0	0	1	1	1	0	0	0	0	0	0	0	0	0	0
589	ECF-040	Andina	Eje Cafetero	Armenia	urbano	4.4	0	1	1	0	1	1	1	1	0	0	0	0	0	0	0	0	0
590	ECF-041	Andina	Eje Cafetero	Armenia	urbano	4.7	1	0	0	0	1	1	1	1	0	0	0	0	0	0	0	0	0
591	ECF-042	Andina	Eje Cafetero	Armenia	urbano	1.5	0	1	1	1	1	1	1	1	0	0	0	0	0	0	0	0	0
592	ECF-043	Andina	Eje Cafetero	Armenia	urbano	5	1	0	0	0	1	1	1	0	0	0	0	0	0	0	0	0	0
593	ECF-044	Andina	Eje Cafetero	Cordoba	urbano	4	0	1	1	1	1	1	0	0	0	0	0	0	0	0	0	0	0
594	ECF-045	Andina	Eje Cafetero	Cordoba	urbano	4	1	1	1	0	1	1	1	1	0	0	0	0	0	0	0	0	0
595	ECF-046	Andina	Eje Cafetero	Pereira	urbano	3	0	0	0	0	0	1	1	1	0	0	0	0	0	0	0	0	0
596	ECF-047	Andina	Eje Cafetero	Pereira	urbano	4	0	0	0	1	0	1	0	0	0	0	0	0	0	0	0	0	0
597	ECF-048	Andina	Eje Cafetero	Pereira	urbano	3	0	1	1	0	1	1	1	1	0	0	0	0	0	0	0	0	0
598	ECF-049	Andina	Eje Cafetero	Pereira	urbano	3	1	0	0	0	1	1	1	1	0	0	0	0	0	0	0	0	0
599	ECF-050	Andina	Eje Cafetero	Pereira	urbano	3	0	1	1	0	1	1	0	1	0	0	0	0	0	0	0	0	0
600	GUA-001	Amazonía	Guainía	Puerto Inírida	urbano	2	1	1	1	0	1	1	1	1	0	0	0	0	0	0	0	0	0
601	GUA-002	Amazonía	Guainía	Puerto Inírida	urbano	4	0	1	0	0	1	1	1	0	0	0	0	0	0	0	0	0	0
602	GUA-003	Amazonía	Guainía	Puerto Inírida	urbano	7	1	1	1	1	1	0	NA	NA	NA	NA	NA	NA	NA	NA	NA	NA	NA
603	GUA-004	Amazonía	Guainía	Puerto Inírida	urbano	4	1	1	0	0	1	1	1	0	0	0	0	0	0	0	0	0	0
604	GUA-005	Amazonía	Guainía	Puerto Inírida	urbano	2	0	0	1	0	0	1	1	0	0	0	0	0	0	0	0	0	0
605	GUA-006	Amazonía	Guainía	Puerto Inírida	urbano	4	1	1	0	0	1	1	0	1	0	0	0	0	0	0	0	0	0
606	GUA-007	Amazonía	Guainía	Puerto Inírida	urbano	4	0	0	1	0	1	1	0	1	0	0	0	0	0	0	0	0	0
607	GUA-008	Amazonía	Guainía	Puerto Inírida	urbano	2	1	1	1	1	1	1	1	1	0	0	0	0	0	0	0	0	0
608	GUA-009	Amazonía	Guainía	Puerto Inírida	urbano	2	0	1	0	0	1	1	0	1	0	0	0	0	0	0	0	0	0
609	GUA-010	Amazonía	Guainía	Puerto Inírida	urbano	2	0	0	1	0	0	1	1	1	0	0	0	0	0	0	0	0	0
610	GUA-011	Amazonía	Guainía	Puerto Inírida	urbano	3	1	0	1	0	1	1	1	1	0	0	0	0	0	0	0	0	0
611	GUA-012	Amazonía	Guainía	Puerto Inírida	urbano	5	0	1	1	0	0	1	0	1	0	0	0	0	0	0	0	0	0
612	GUA-013	Amazonía	Guainía	Puerto Inírida	urbano	4	0	1	0	0	1	1	1	1	0	0	0	0	0	0	0	0	0
613	GUA-014	Amazonía	Guainía	Puerto Inírida	urbano	4	1	1	1	0	1	1	1	1	0	0	0	0	0	0	0	0	0
614	GUA-015	Amazonía	Guainía	Puerto Inírida	urbano	4	0	1	1	0	0	1	0	1	0	0	0	0	0	0	0	0	0
615	GUA-016	Amazonía	Guainía	Puerto Inírida	urbano	4	1	0	0	0	1	1	1	1	0	0	0	0	0	0	0	0	0
616	GUA-017	Amazonía	Guainía	Caño Conejo	rural	3	1	0	1	0	1	1	1	1	0	0	0	0	0	0	0	0	0
617	GUA-018	Amazonía	Guainía	Caño Conejo	rural	10	0	0	0	1	1	1	1	1	0	0	0	0	0	0	0	0	0
618	GUA-019	Amazonía	Guainía	Caño Conejo	rural	5	0	1	0	0	1	1	1	1	0	0	0	0	0	0	0	0	0
619	GUA-020	Amazonía	Guainía	Caño Conejo	rural	3	0	1	1	0	0	1	1	1	0	0	0	0	0	0	0	0	0
620	GUA-021	Amazonía	Guainía	Caño Conejo	rural	11	1	1	0	0	1	1	1	1	0	0	0	0	0	0	0	0	0
621	GUA-022	Amazonía	Guainía	Caño Conejo	rural	3.2	0	0	1	0	1	1	1	1	0	0	0	0	0	0	0	0	0
622	GUA-023	Amazonía	Guainía	Caño Conejo	rural	4.2	0	1	0	1	1	1	0	1	0	0	0	0	0	0	0	0	0
623	GUA-024	Amazonía	Guainía	Caño Conejo	rural	3.1	1	1	0	0	1	1	1	1	0	0	0	0	0	0	0	0	0
624	GUA-025	Amazonía	Guainía	Caño Conejo	rural	4	0	0	1	0	0	1	0	1	0	0	0	0	0	0	0	0	0
625	GUA-026	Amazonía	Guainía	Caño Conejo	rural	3.11	1	0	1	0	1	1	1	1	0	0	0	0	0	0	0	0	0
626	GUA-027	Amazonía	Guainía	Caño Conejo	rural	4.4	0	1	0	0	1	1	1	1	0	0	0	0	0	0	0	0	0
627	GUA-028	Amazonía	Guainía	Caño Conejo	rural	4.4	1	0	1	1	1	1	1	1	0	0	0	0	0	0	0	0	0
628	GUA-029	Amazonía	Guainía	Caño Conejo	rural	4.7	0	1	0	0	0	1	1	1	0	0	0	0	0	0	0	0	0
629	GUA-030	Amazonía	Guainía	Caño Conejo	rural	1.5	0	1	0	1	1	1	1	1	0	0	0	0	0	0	0	0	0
630	GUA-031	Amazonía	Guainía	Caño Conejo	rural	5	0	1	0	0	1	1	1	1	0	0	0	0	0	0	0	0	0
631	GUA-032	Amazonía	Guainía	Coco Nuevo	rural	4	0	0	1	0	1	1	0	1	0	0	0	0	0	0	0	0	0
632	GUA-033	Amazonía	Guainía	Coco Nuevo	rural	3	0	0	0	1	0	1	0	0	0	0	0	0	0	0	0	0	0
633	GUA-034	Amazonía	Guainía	Coco Nuevo	rural	4	0	1	0	0	0	1	1	1	0	0	0	0	0	0	0	0	0
634	GUA-035	Amazonía	Guainía	Coco Nuevo	rural	3	1	1	1	0	1	1	1	0	0	0	0	0	0	0	0	0	0
635	GUA-036	Amazonía	Guainía	Coco Nuevo	rural	4	1	0	0	0	1	1	1	1	0	0	0	0	0	0	0	0	0
636	GUA-037	Amazonía	Guainía	Coco Nuevo	rural	3	1	1	1	0	1	1	0	0	0	0	0	0	0	0	0	0	0
637	GUA-038	Amazonía	Guainía	Coco Nuevo	rural	4	0	0	0	1	0	1	1	1	0	0	0	0	0	0	0	0	0
638	GUA-039	Amazonía	Guainía	Coco Nuevo	rural	3	1	1	1	0	1	1	1	1	0	0	0	0	0	0	0	0	0
639	GUA-040	Amazonía	Guainía	Coco Nuevo	rural	3	0	1	0	0	0	1	1	1	0	0	0	0	0	0	0	0	0
640	GUA-041	Amazonía	Guainía	Coco Nuevo	rural	4	1	1	1	0	1	0	NA	NA	NA	NA	NA	NA	NA	NA	NA	NA	NA
641	GUA-042	Amazonía	Guainía	Coco Nuevo	rural	6.5	0	0	0	0	1	0	NA	NA	NA	NA	NA	NA	NA	NA	NA	NA	NA
642	GUA-043	Amazonía	Guainía	Coco Nuevo	rural	4	1	1	1	1	1	0	NA	NA	NA	NA	NA	NA	NA	NA	NA	NA	NA
643	GUA-044	Amazonía	Guainía	Coco Nuevo	rural	3	0	1	0	0	1	1	0	0	0	0	0	0	0	0	0	0	0
644	GUA-045	Amazonía	Guainía	Coco Viejo	rural	10	0	1	1	1	1	0	NA	NA	NA	NA	NA	NA	NA	NA	NA	NA	NA
645	GUA-046	Amazonía	Guainía	Coco Viejo	rural	5	0	1	0	0	1	1	1	1	0	0	0	0	0	0	0	0	0
646	GUA-047	Amazonía	Guainía	Coco Viejo	rural	3	0	0	1	0	1	1	1	1	0	0	0	0	0	0	0	0	0
647	GUA-048	Amazonía	Guainía	Coco Viejo	rural	11	0	0	0	0	1	0	NA	NA	NA	NA	NA	NA	NA	NA	NA	NA	NA
648	GUA-049	Amazonía	Guainía	Coco Viejo	rural	8	1	0	0	0	1	1	1	1	0	0	0	0	0	0	0	0	0
649	GUA-050	Amazonía	Guainía	Coco Viejo	rural	3	0	1	0	0	1	1	1	0	0	0	0	0	0	0	0	0	0
